# Supplementary material
Source: PubMed Central journal article supplement (PMC5345851)
Supplement: NIHMS848763-supplement-Supp__Fig_3.pdf [file NIHMS848763-supplement-Supp__Fig_3.pdf]

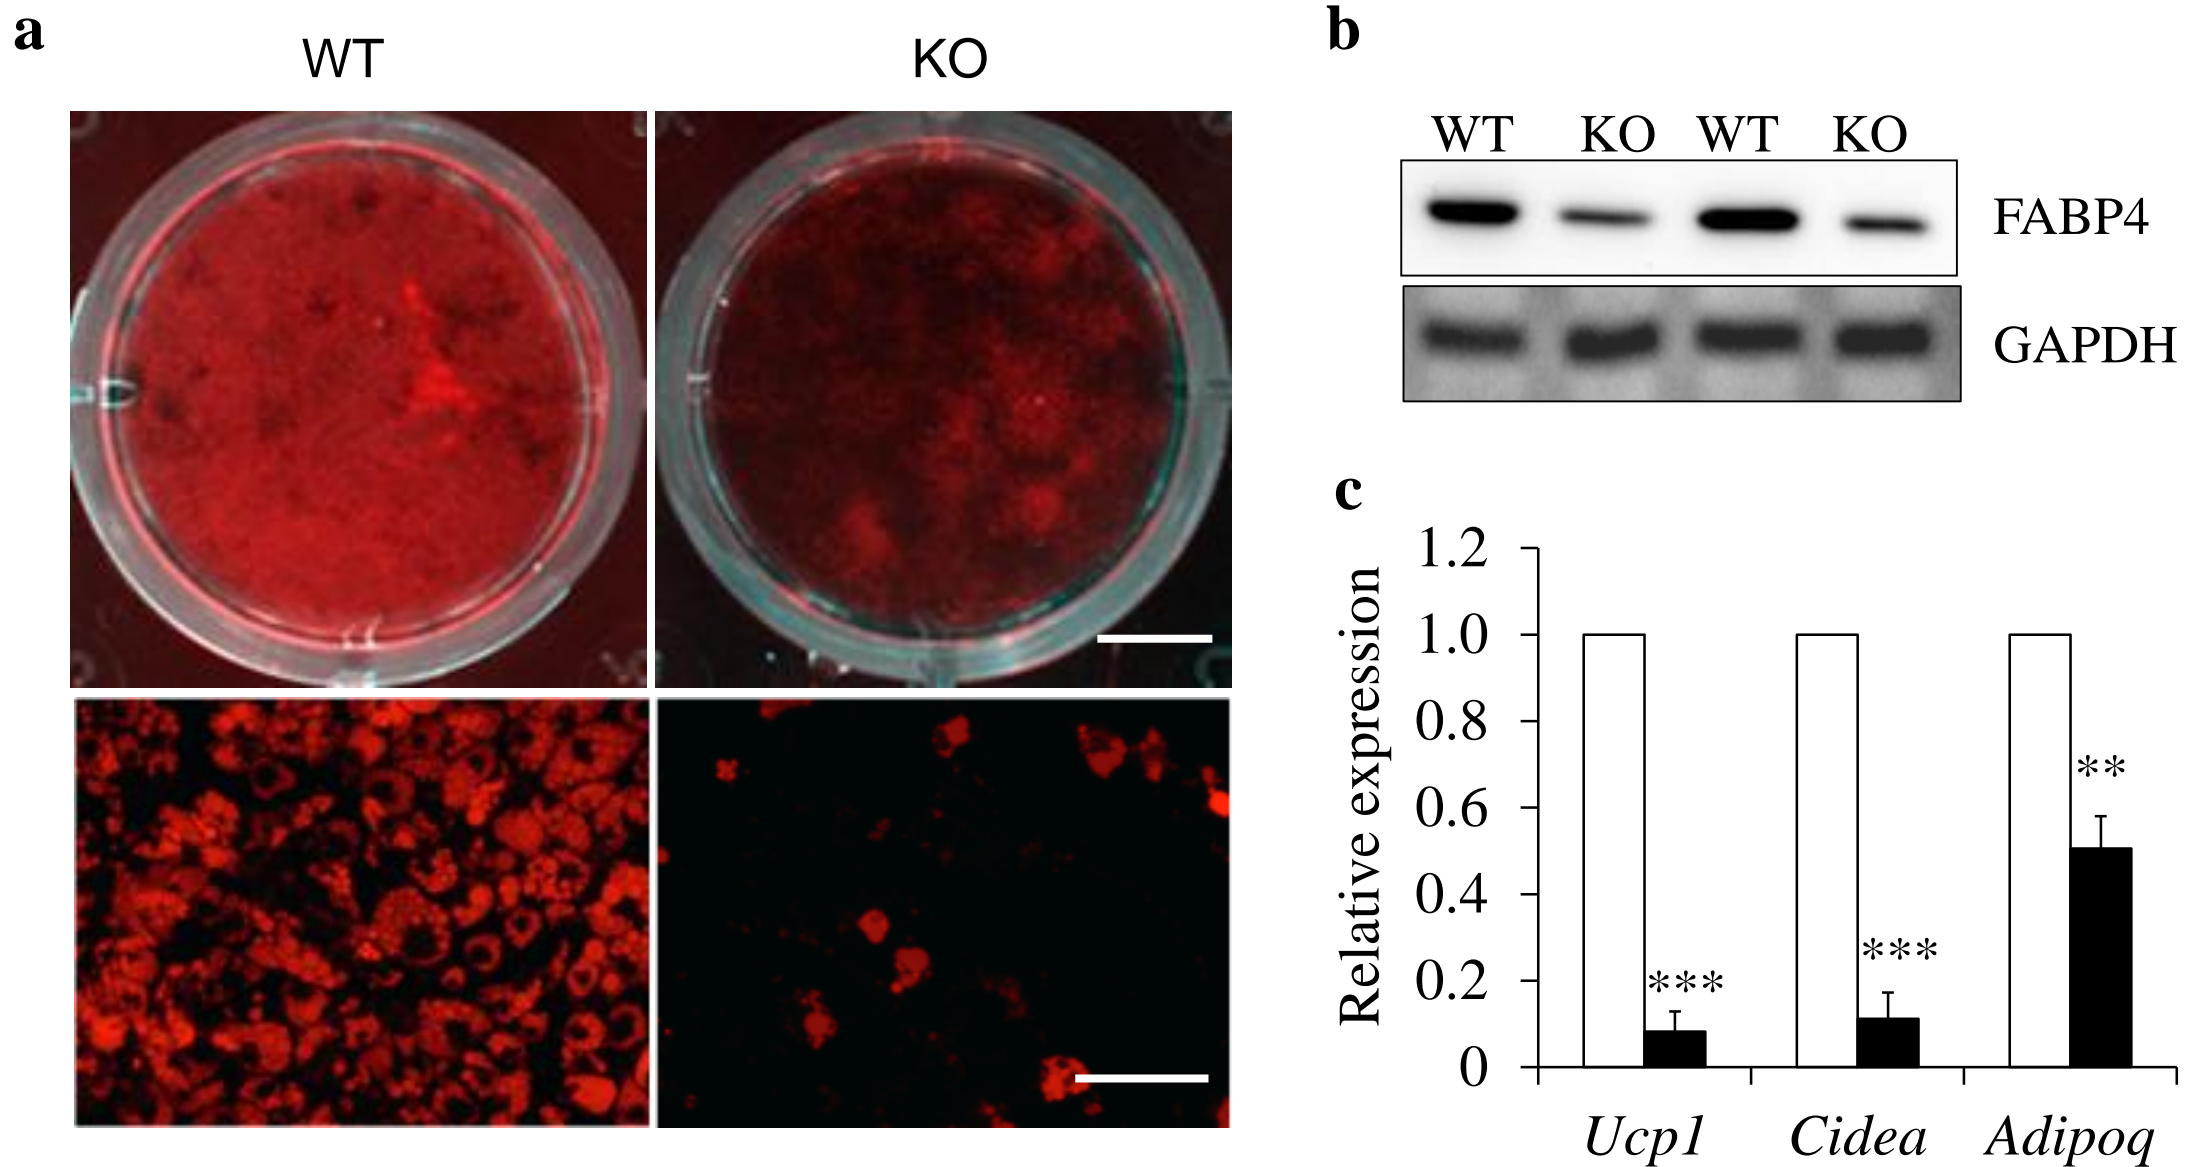

**ESM Fig. 3.** Absence of *mTOR* inhibits brown adipocytes differentiation. (a) Oil red O staining of WT and KO BAT cells after differentiation. Scale bars: top one 5 mm, bottom one 100  $\mu$ m. (b) The protein levels of FABP4 in WT and KO BAT cells after differentiation. (c) The mRNA levels of *Ucp1*, *Cidea* and *Adipoq* in WT and KO cells after differentiation (n=9). White bars, WT cells; black bars, KO cells. Error bars represent SEM. \*\*  $p < 0.01$ , \*\*\*  $p < 0.001$ .
