# Supplementary material
Source: PubMed Central journal article supplement (PMC5345851)
Supplement: NIHMS848763-supplement-Supp__Fig_4.pdf [file NIHMS848763-supplement-Supp__Fig_4.pdf]

**a**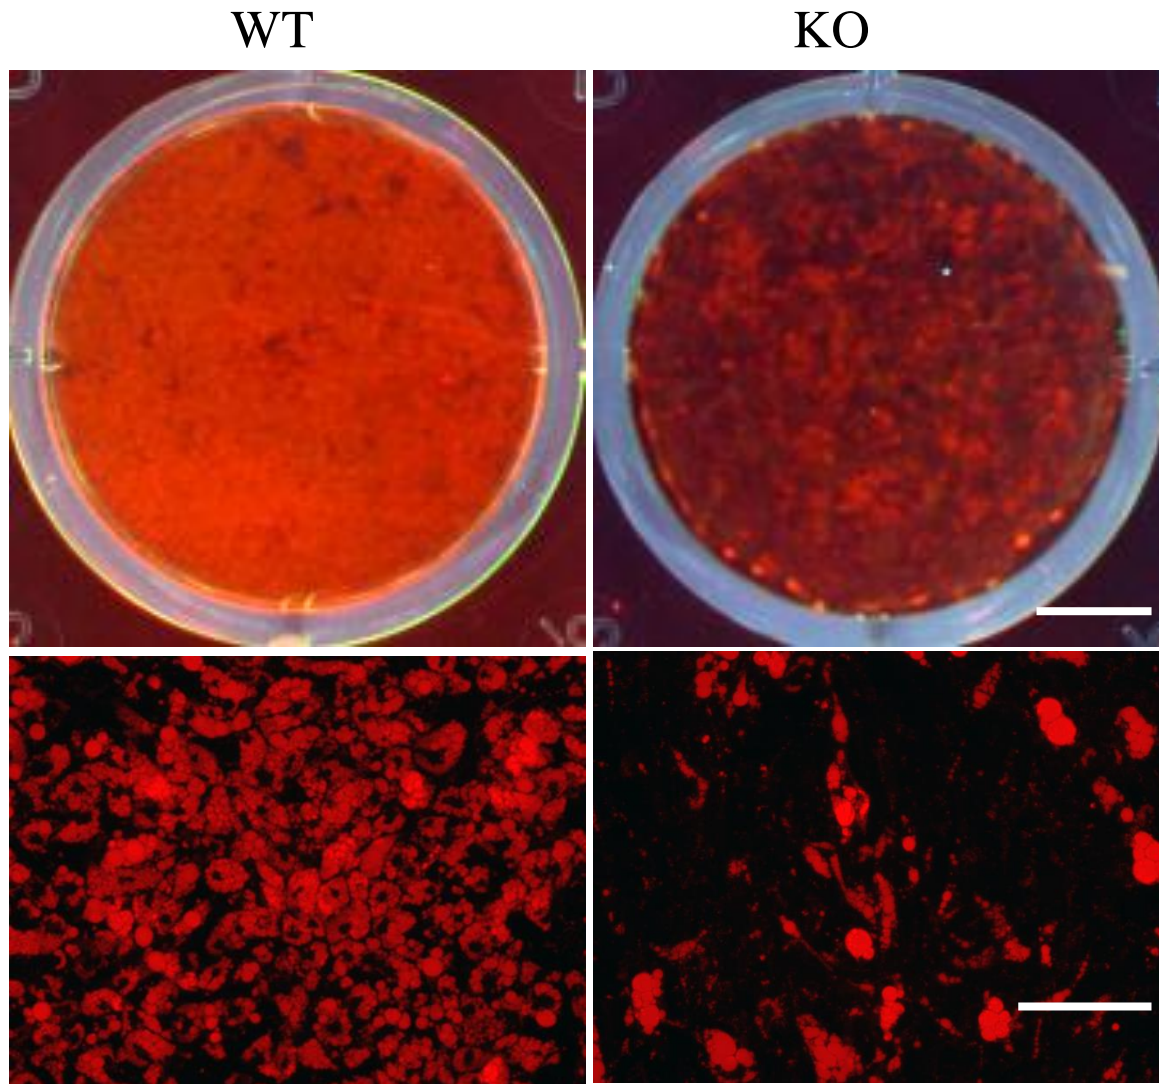**b**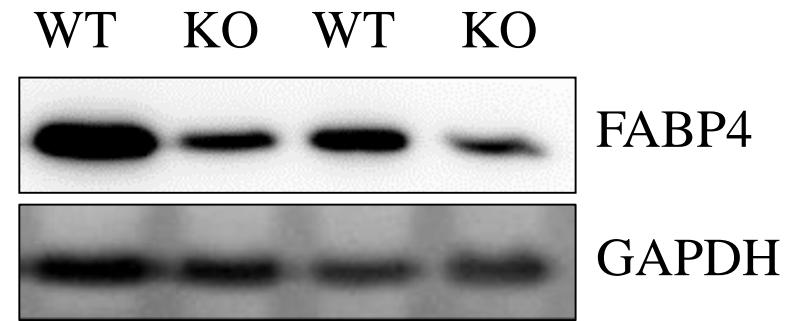**c**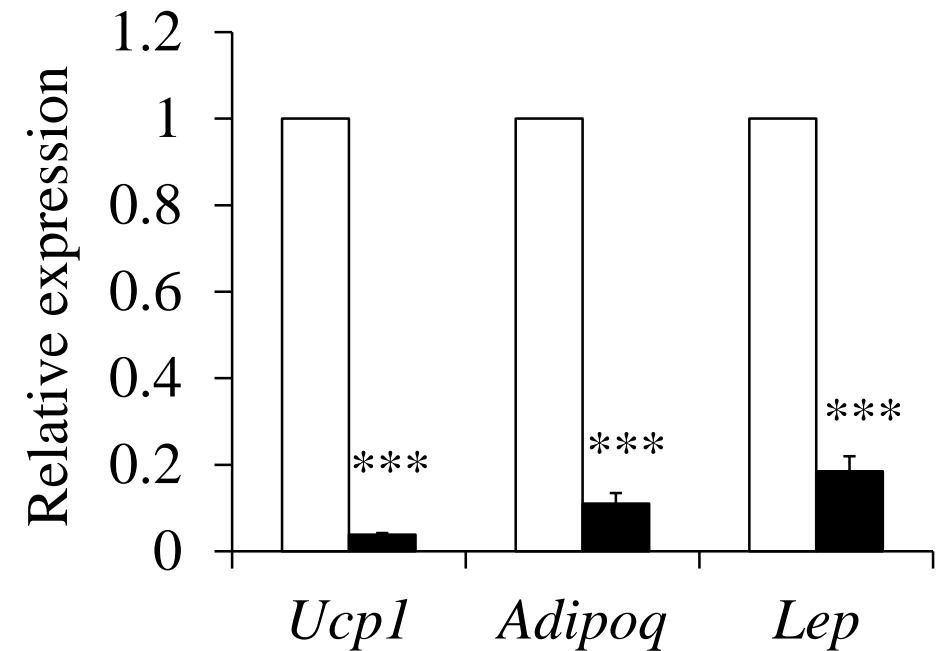

**ESM Fig. 4.** Absence of *mTOR* inhibits white adipocytes differentiation. (a) Oil red O staining of WT and KO iWAT cells after differentiation. Scale bars: top one 5 mm, bottom one 100  $\mu$ m. (b) The protein levels of FABP4 in WT and KO iWAT cells after differentiation. (c) The mRNA levels of *Ucp1*, *Adipoq* and *Lep* in WT and KO iWAT cells after differentiation (n=9). White bars, WT cells; black bars, KO cells. Error bars represent SEM. \*\*\*  $p < 0.001$ .
