# Supplementary material
Source: PubMed Central journal article supplement (PMC5345851)
Supplement: NIHMS848763-supplement-Supp__Fig_5.pdf [file NIHMS848763-supplement-Supp__Fig_5.pdf]

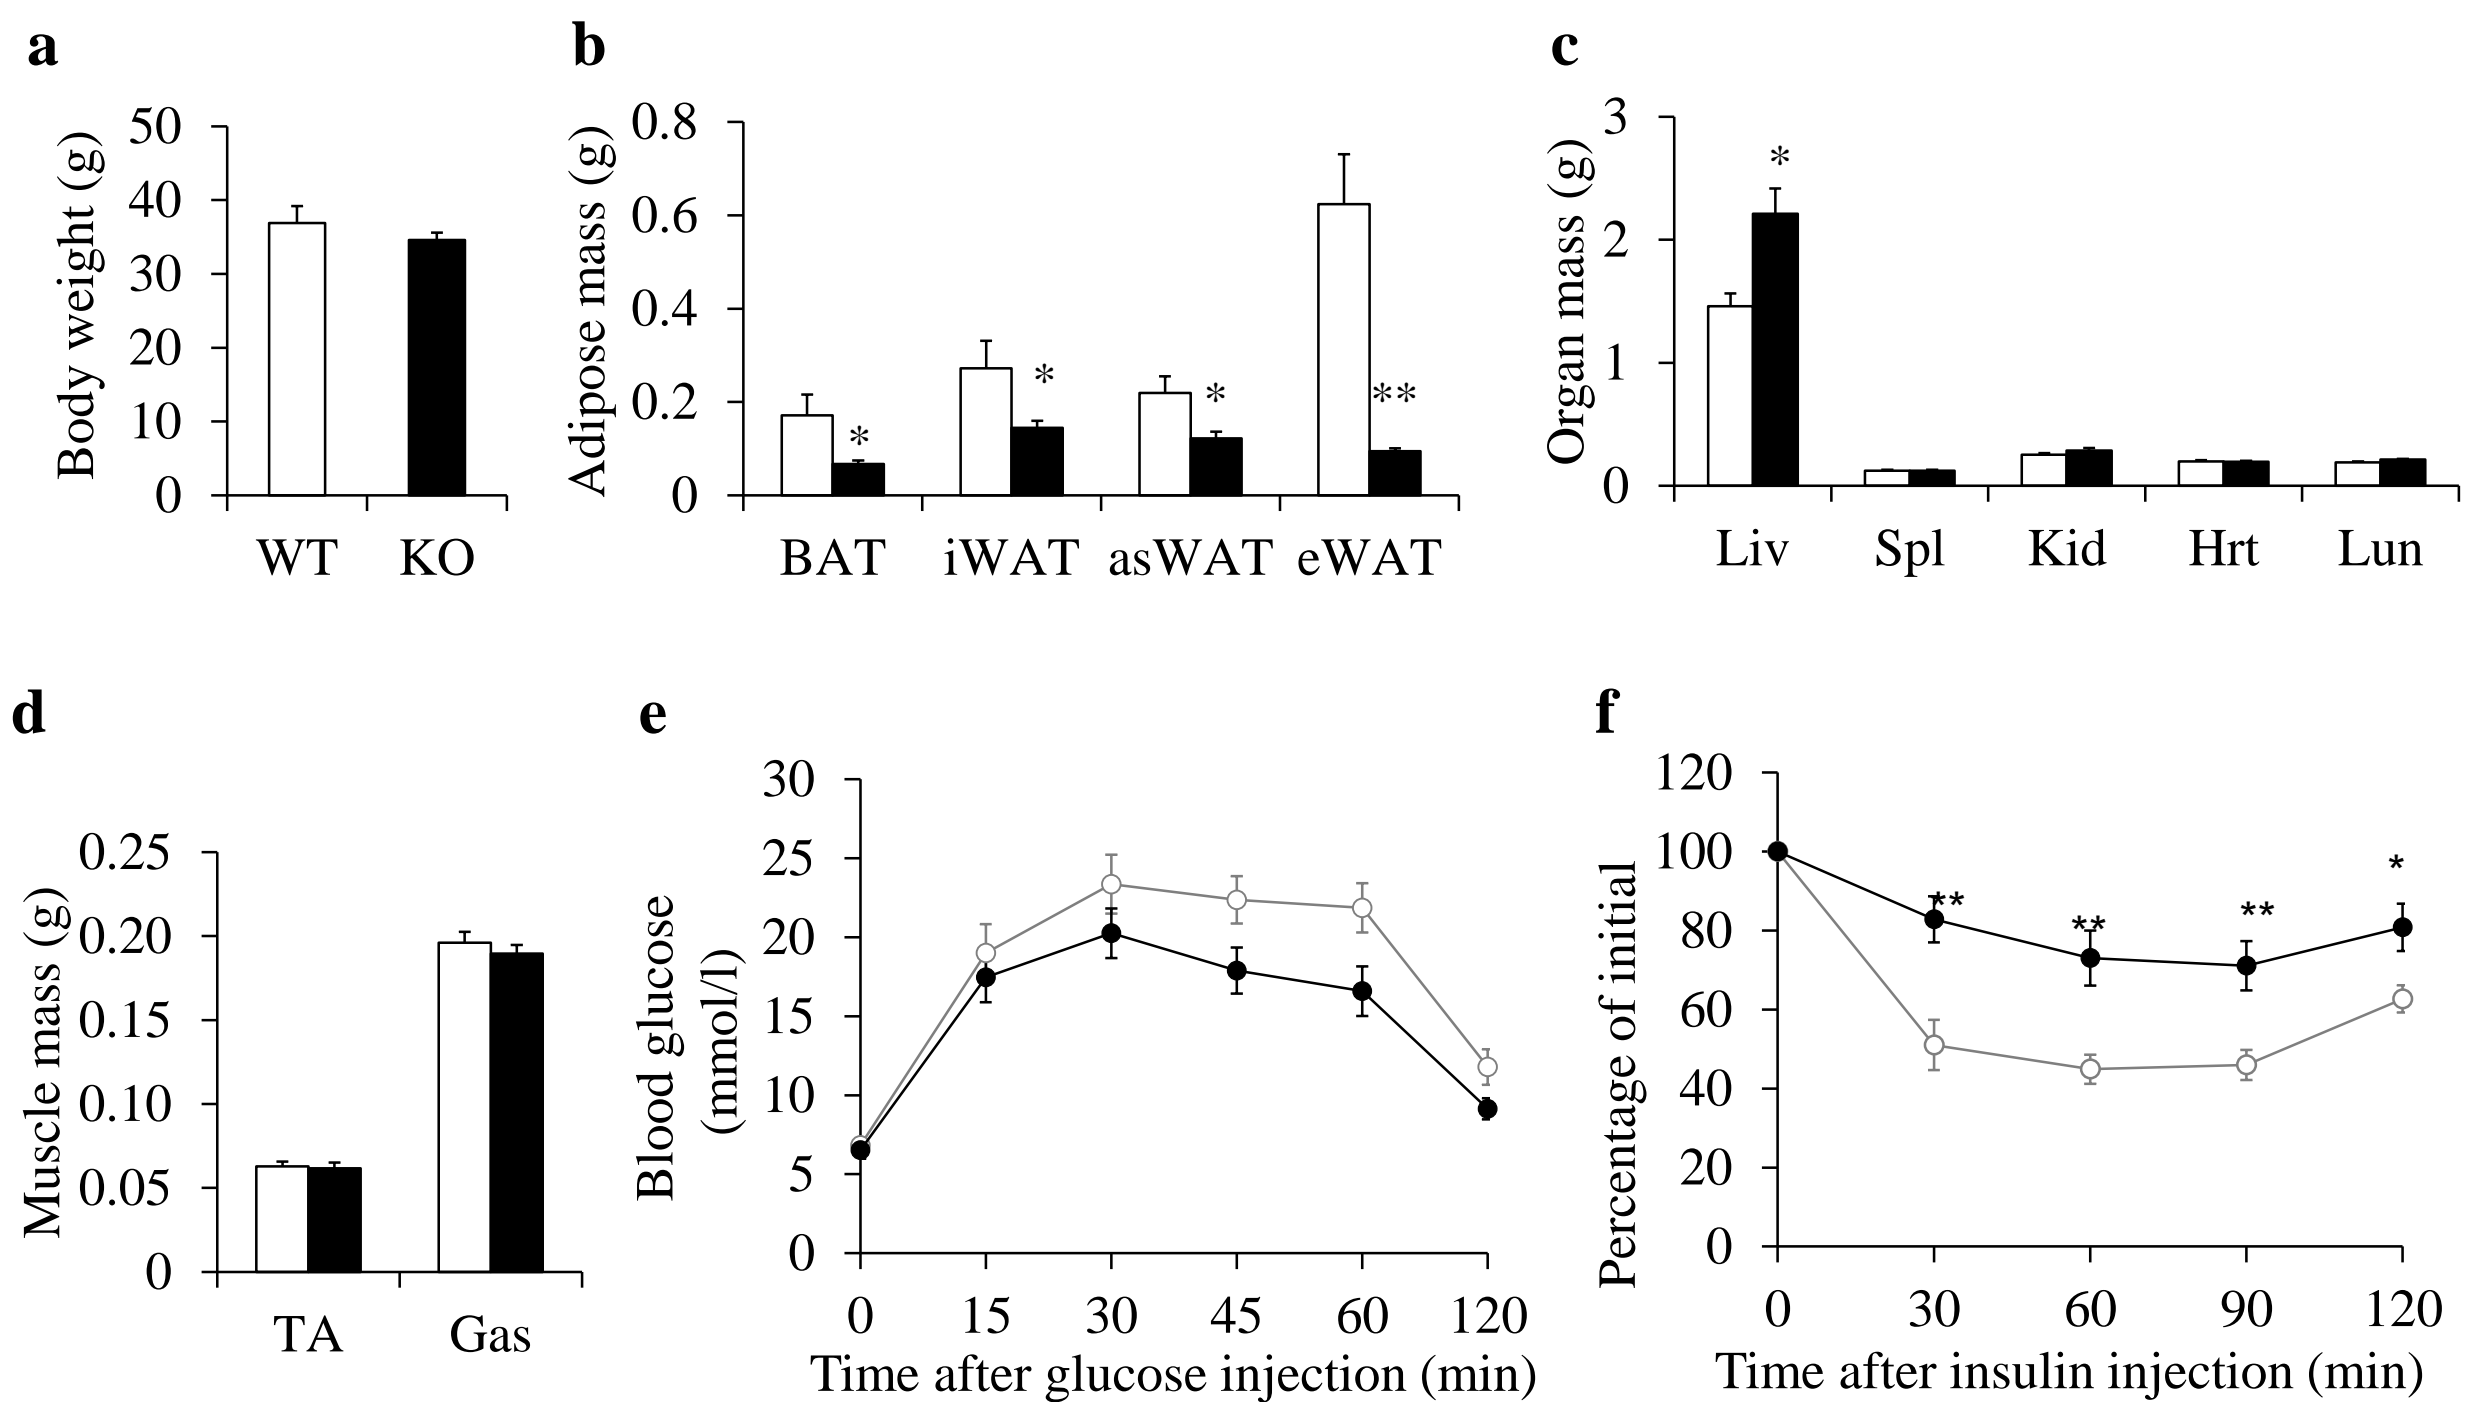

**ESM Fig. 5.** Mice deletion of *mTOR* has less fat mass and insulin resistance after HFD feeding. (a) The body weight of the WT (n=6) and KO (n=7) mice after 10 weeks HFD. (b-d) The mass of adipose tissues (b), organs (c) and muscles (d) of the WT and KO mice after 10 weeks HFD. (e, f) Blood glucose concentrations during GTT (e, WT n=5, KO n=4) and ITT (f, WT n=6, KO n=4) after 10-week high-fat diet. White bars and circles, WT mice; black bars and circles, KO mice. Error bars represent SEM. \*  $p < 0.05$ , \*\*  $p < 0.01$ .
