# Supplementary material
Source: PubMed Central journal article supplement (PMC5345851)
Supplement: NIHMS848763-supplement-Supp__Fig_6.pdf [file NIHMS848763-supplement-Supp__Fig_6.pdf]

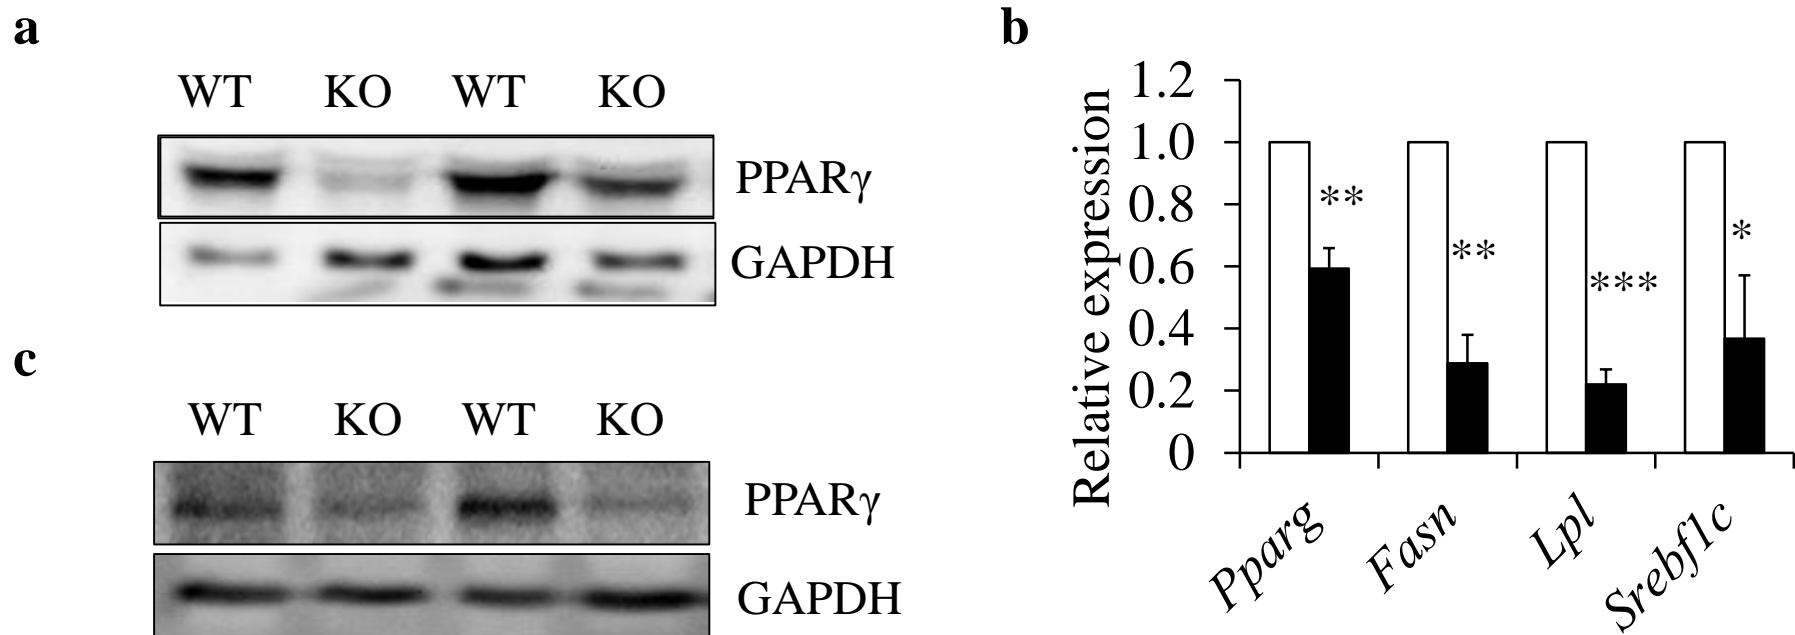

**ESM Fig. 6.** Deletion of *mTOR* decreases PPAR $\gamma$  expression in white adipocytes. (a) Protein levels of PPAR $\gamma$  in iWAT from WT and KO mice. (b) mRNA levels of *Pparg*, *Fasn*, *Lpl* and *Srebf1c* in iWAT from WT and KO mice (  $n=5$ ). (c) Protein levels of PPAR $\gamma$  in differentiated WT and KO iWAT adipocytes. White bars, WT mice; black bars, KO mice. Error bars represent SEM. \*  $p < 0.05$ , \*\*  $p < 0.01$ , \*\*\*  $p < 0.001$ .
