# Supplementary material
Source: PubMed Central journal article supplement (PMC5345851)
Supplement: NIHMS848763-supplement-Supp_Fig_1.pdf [file NIHMS848763-supplement-Supp_Fig_1.pdf]

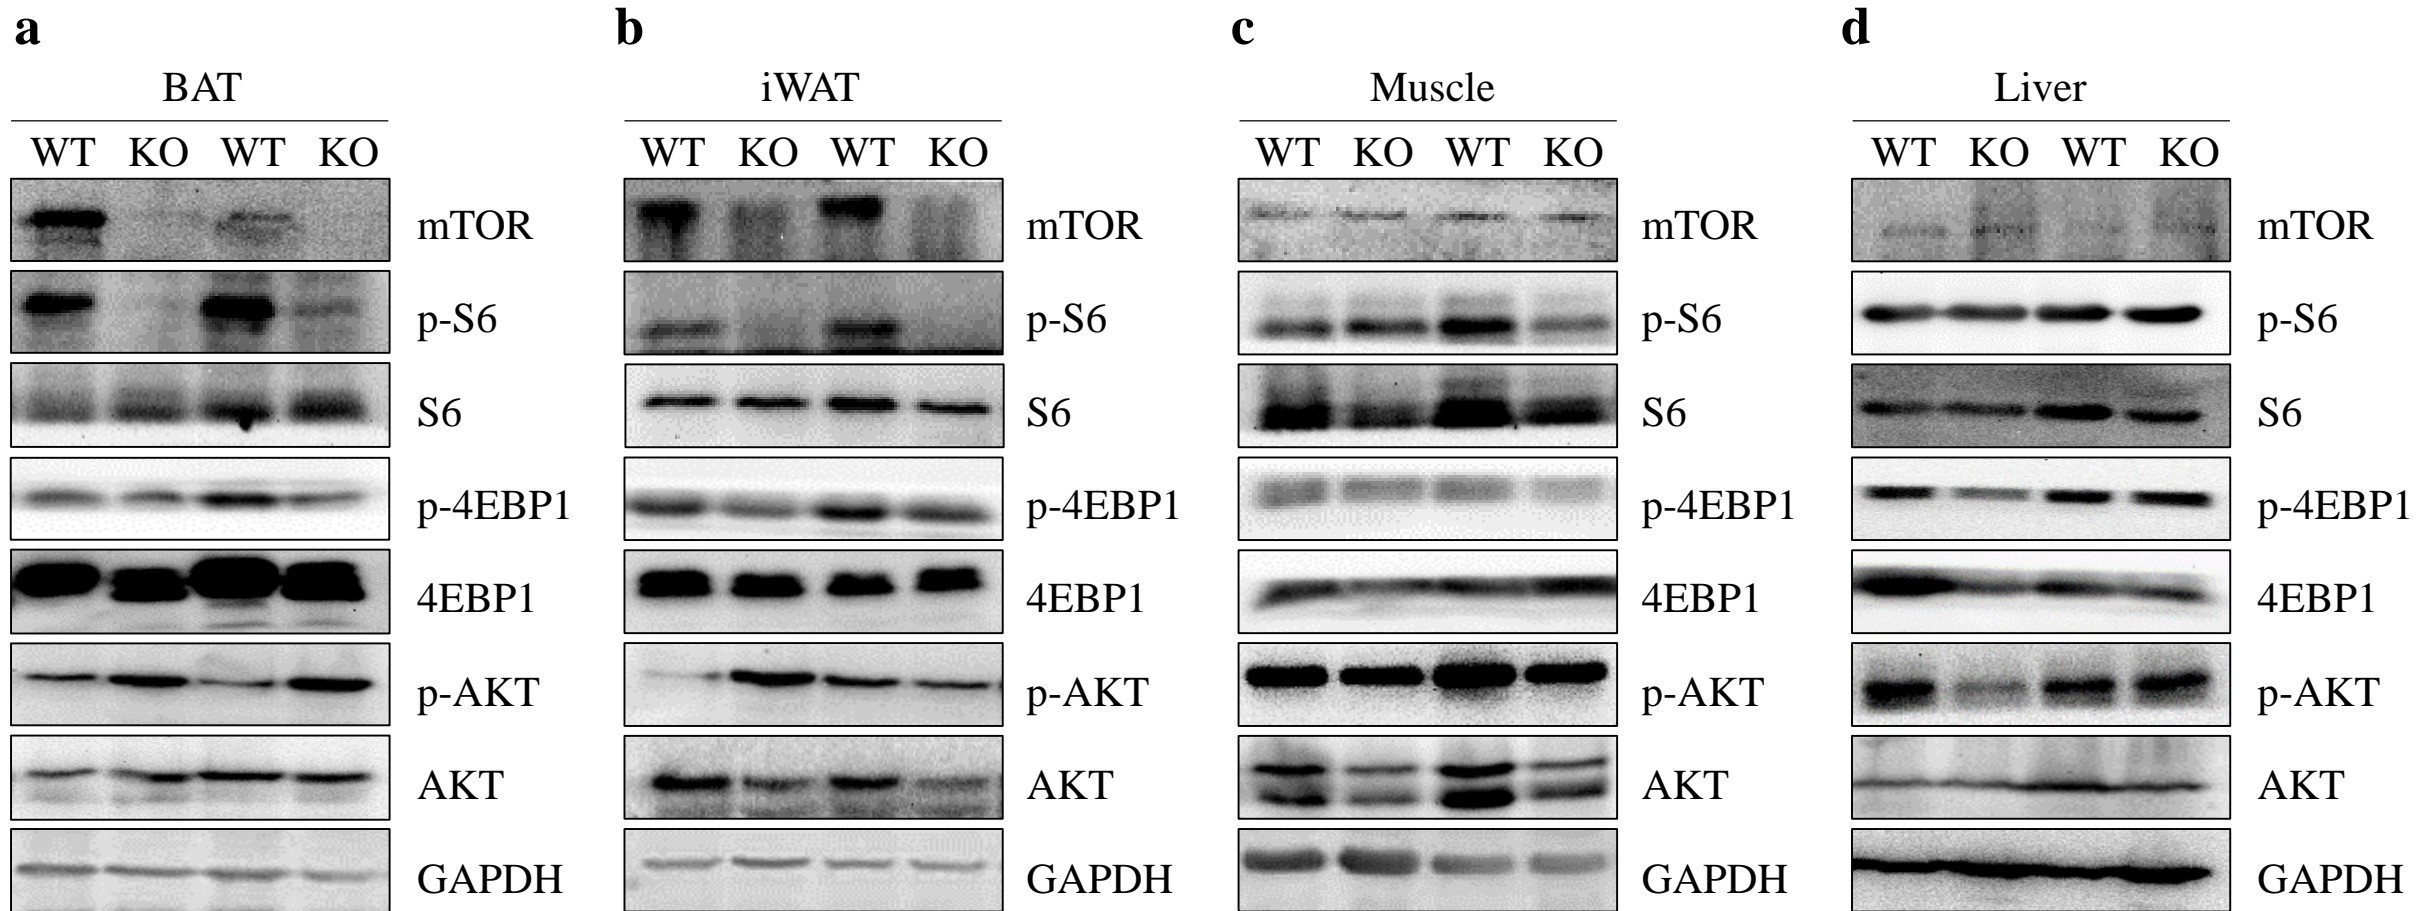

**ESM Fig. 1.** The protein levels of the *mTOR* signaling pathway proteins in BAT (a), iWAT (b), TA muscle (c) and liver (d). S6, S6 ribosomal protein; p-S6, phospho-S6; 4EBP1, eukaryotic translation initiation factor 4E binding protein 1; p-4EBP1, phospho-4EBP1; AKT, protein kinase B; p-AKT, phospho-AKT.
