# Supplementary material
Source: PubMed Central journal article supplement (PMC5345851)
Supplement: NIHMS848763-supplement-Supp_Fig_2.pdf [file NIHMS848763-supplement-Supp_Fig_2.pdf]

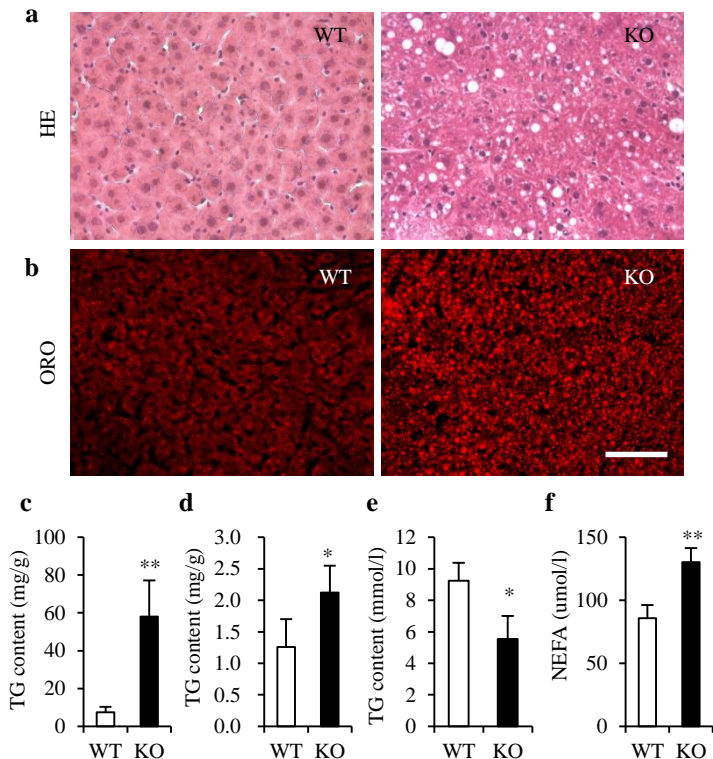

**ESM Fig. 2.** Adipocyte-specific deletion of *mTOR* causes fatty liver. (a) HE staining of liver sections. (b) Oil red O staining of liver sections from WT (*mTOR<sup>fllox/fllox</sup>*) and KO (*Adipoq-mTOR*) mice. Scale bars: 100  $\mu$ m. (c-e) TG levels in liver (c), skeletal muscle (d) and serum (e). n=4. (f) NEFA levels in serum (n=5). 6 months old mice were used for TG and NEFA measurement. White bars, WT mice; black bars, KO mice. Error bars: S.E.M., \*  $p < 0.05$ , \*\*  $p < 0.01$ .
